# Supplementary material
Source: Springer Nature journal article supplement (https://www.springermedizin.de/resource/supplementary/12889_2008_1491_MOESM1_ESM.pdf/9504408)
Supplement: MOESM1 [file 9504408]

Potentially relevant articles identified through Medline and Embase searches:  $n = A$

Articles excluded based on title and abstract review:  $n = B$

- Not prospective cohort:  $n = B$  (i)
- Non-generalizable population:  $n = B$  (ii)
- Irrelevant subject matter:  $n = B$  (iii)
- Drug or treatment:  $n = B$  (iv)
- Food and nutrition:  $n = B$  (v)
- Review article:  $n = B$  (vi)
- Duplicate:  $n = B$  (vii)

Articles ordered for more detailed review:  $n = C$

Articles excluded after detailed review:  $n = D$

- Population not generalizable:  $n = D$  (i)
- Mortality rates used:  $n = D$  (ii)
- Study too small:  $n = D$  (iii)

Articles meeting inclusion criteria and information extracted for meta-analysis:  $n = E$

Articles not amenable to meta-analysis:  $n = F$

- Required information not provided:  $n = F$  (i)
- Same cohort already used:  $n = F$  (ii)

Articles included in final meta-analysis calculations:  $n = G$
